# Supplementary material for: Graphite nanoparticle as nanoquencher for 17β-estradiol detection using shortened aptamer sequence
Source: Royal Society of Chemistry journal article supplement (doi:10.1039/c8an00591e), 2018-01-01
Supplement: c8an00591e1.pdf [file c8an00591e1.pdf]

## Supporting Information

### **Graphite nanoparticle as nanoquecher for 17 $\beta$ -estradiol detection using shortening aptamer sequence**

Xiaoli Qi<sup>a</sup>, Hui Hu<sup>a</sup>, Yuesuo Yang<sup>a,b</sup>, Yunxian Piao<sup>a,\*</sup>

a Key Laboratory of Ground Water Resources and Environment of the Ministry of Education, Department of Environmental Engineering, College of Environment and Resources, Jilin University, 2519 Jiefang Road, Changchun 130021, China

b Key Laboratory of Eco-restoration of Regional Contaminated Environment, Ministry of Education, Shenyang University, 110044, China

**\*Corresponding author:** Professor Yunxian Piao

Key Laboratory of Ground Water Resources and Environment of the Ministry of Education, College of Environment and Resources, Jilin University, 2519 Jiefang Road, Changchun 130021, China

E-mail: yxpiao@jlu.edu.cn, Phone: +86-18604414674, Fax: +86-431-8850-2606

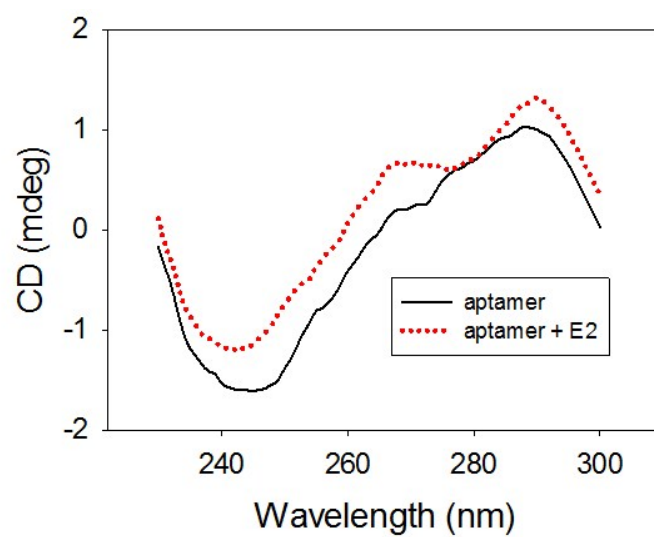

**Fig. S1** The CD spectra of E2 aptamers (2.5  $\mu\text{M}$ ) before and after capturing of E2 (10  $\mu\text{g/mL}$ ).

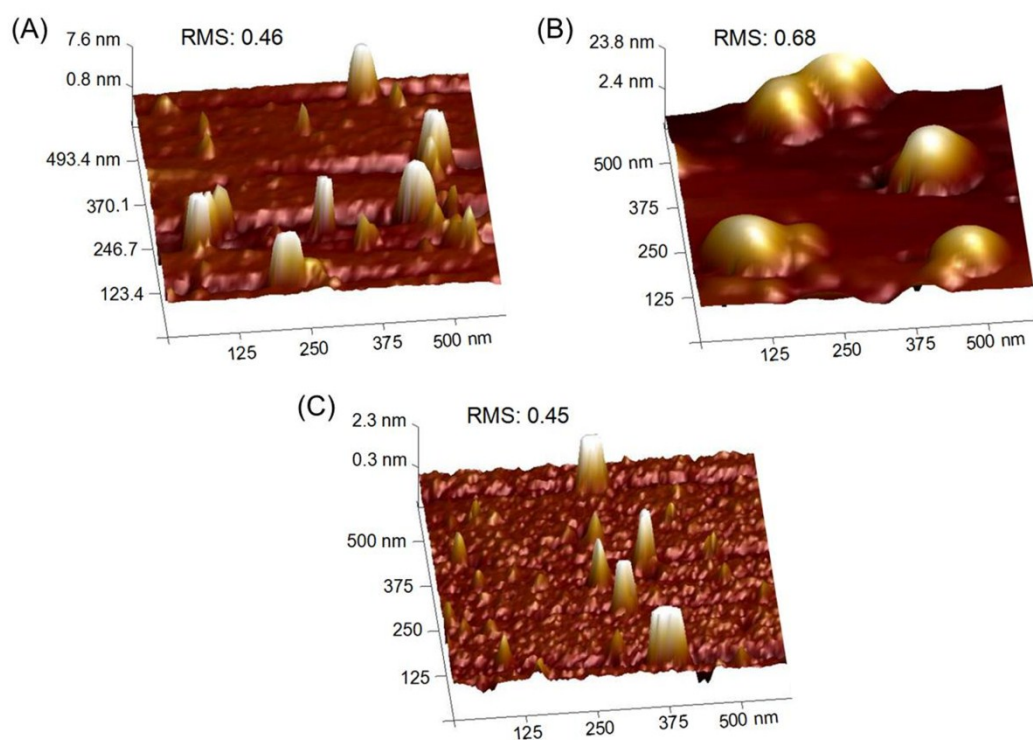

**Fig. S2** 3D AFM images of GN (A), GN/aptamer (B) and GN/aptamer after capturing E2 (C), respectively.

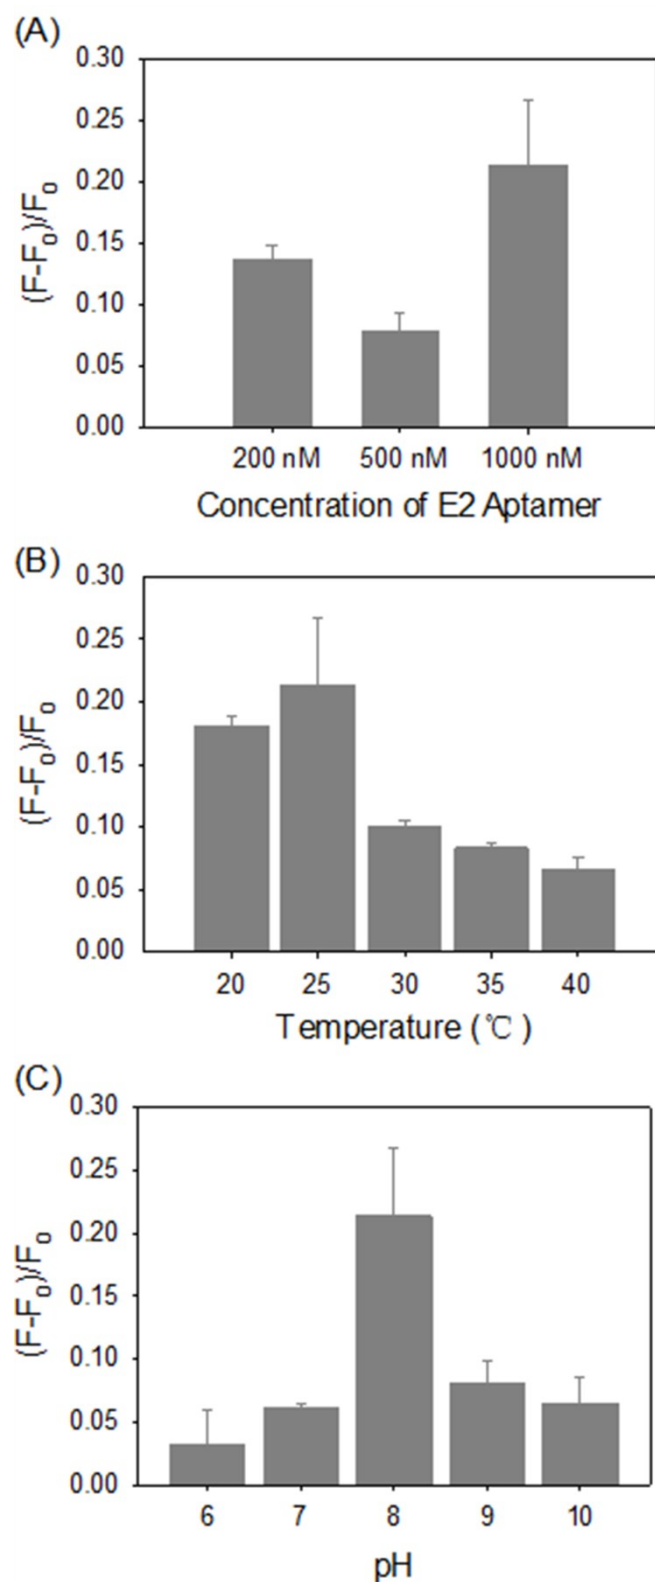

**Fig. S3** Influence of the relevant experimental factors on the change of fluorescence signal in E2 (50 ng/mL) sensing with GN/aptamer: (A) effect by concentration of aptamer, (B) effect by temperature, (C) effect by pH values. The error bars were obtained from triplicate experiments.

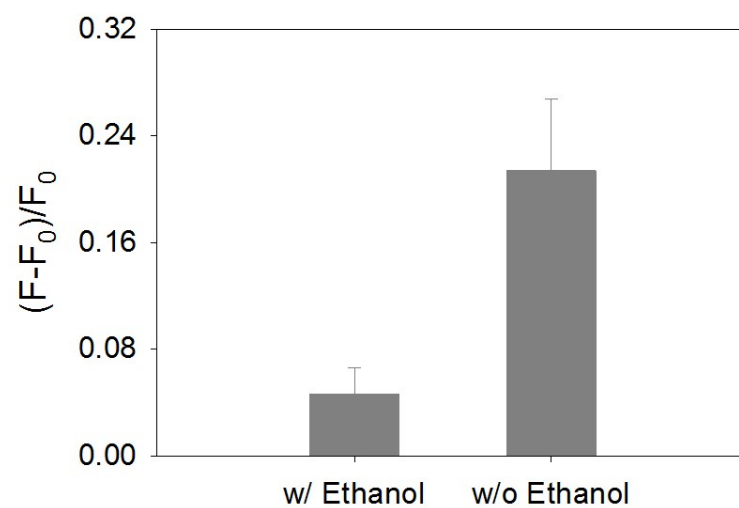

**Fig. S4** Effect of the organic solvent on the fluorescent intensity.
